# Supplementary material
Source: PubMed Central journal article supplement (PMC4110927)

**A**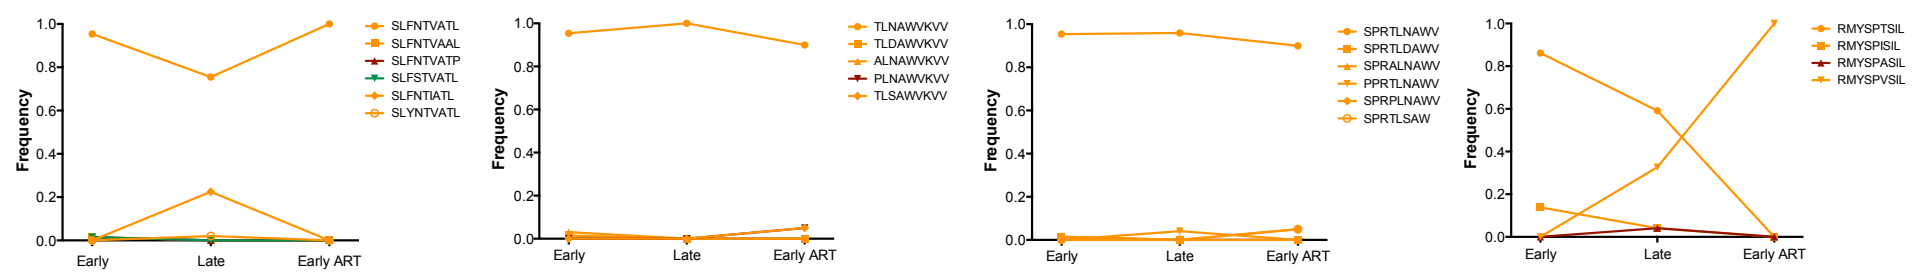**B**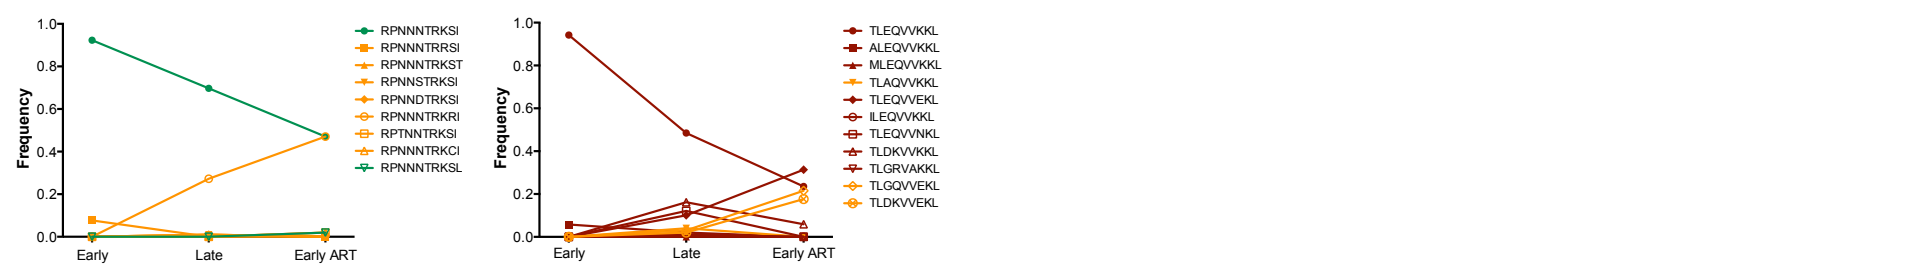**C**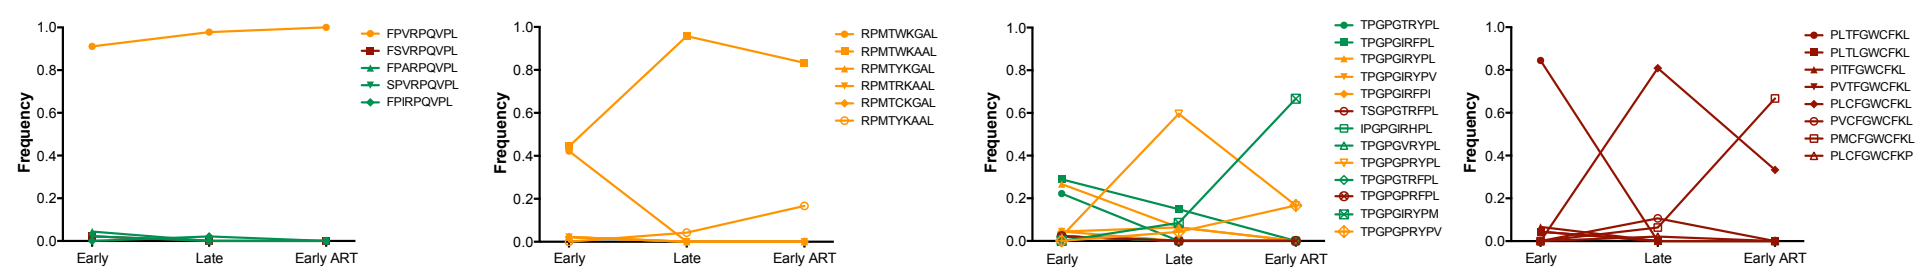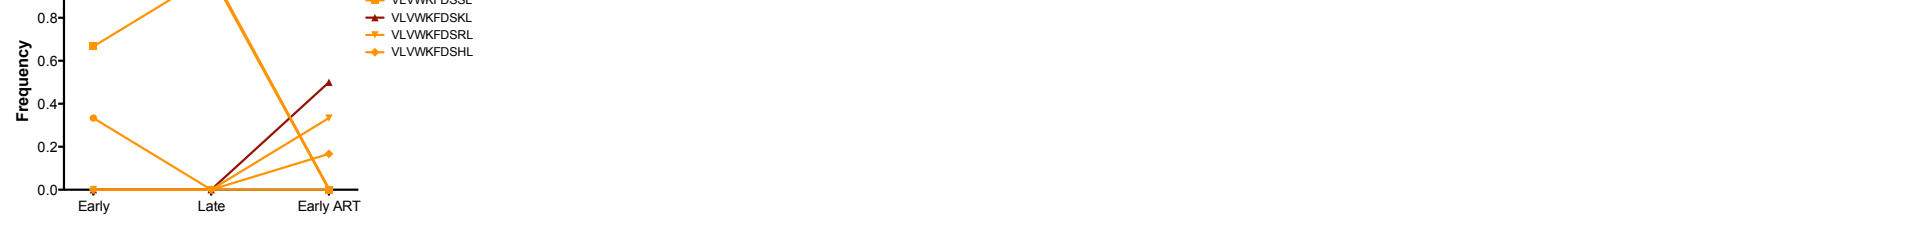

— High Affinity  
— Medium Affinity  
— Low Affinity

Supplement: NIHMS605132-supplement-01.pdf [file NIHMS605132-supplement-01.pdf]

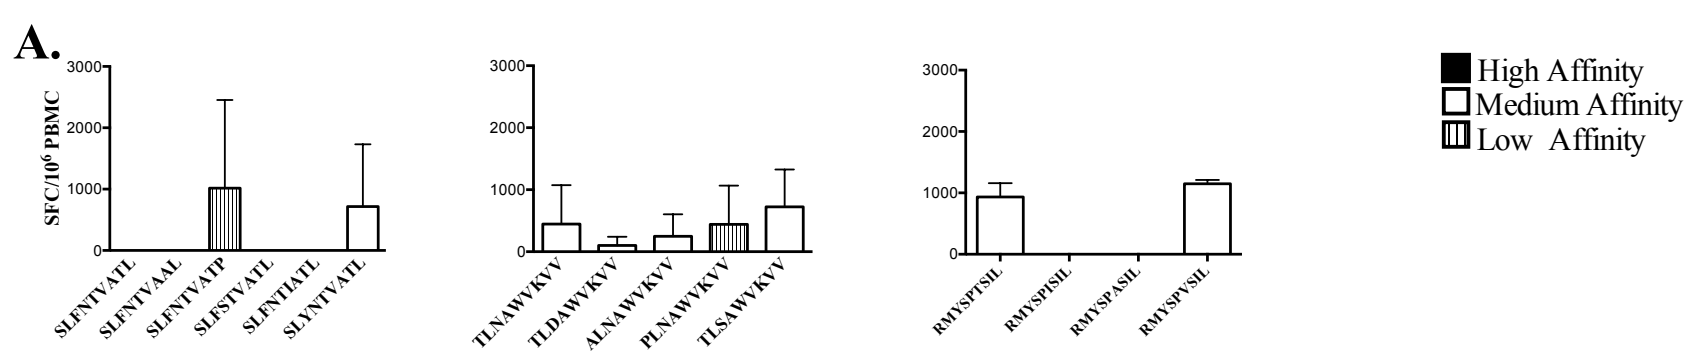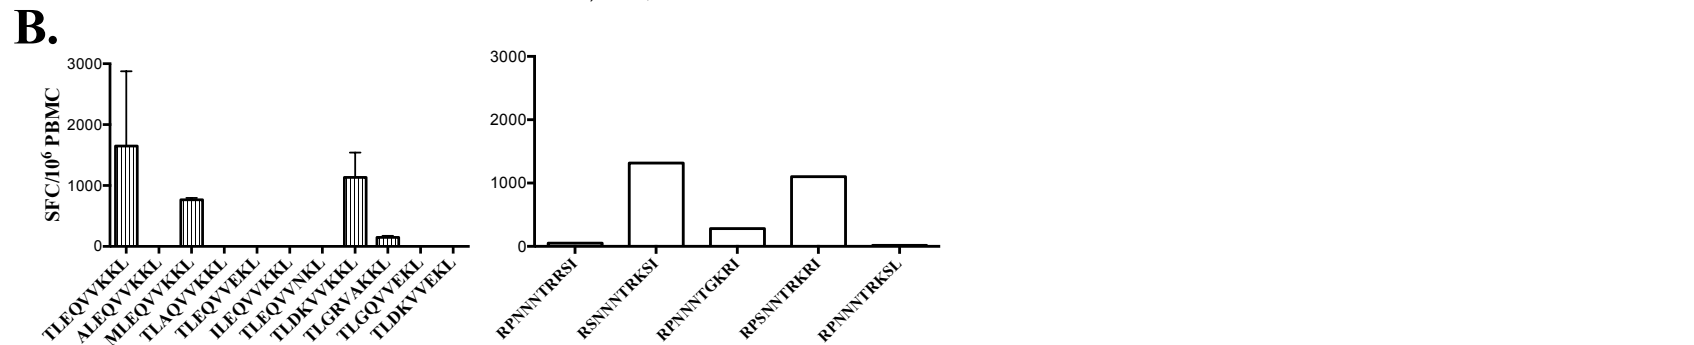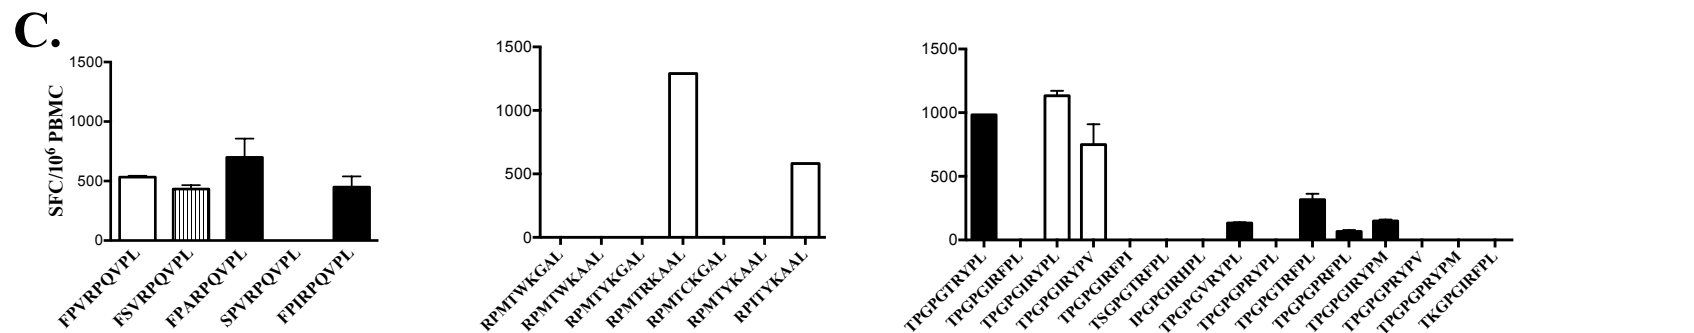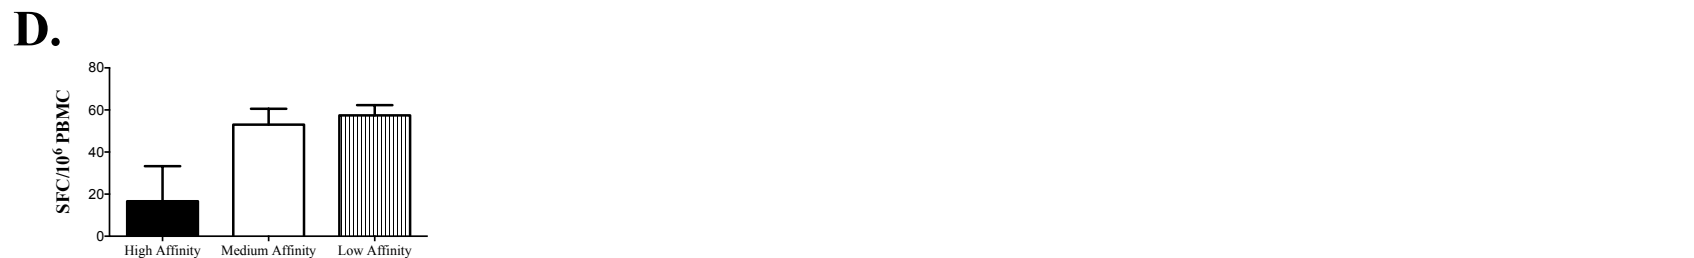

Supplement: NIHMS605132-supplement-03.pdf [file NIHMS605132-supplement-03.pdf]
